# Supplementary material
Source: Springer Nature journal article supplement (https://www.springermedizin.de/resource/supplementary/13019_2011_392_MOESM1_ESM.pdf/9638584)
Supplement: MOESM1 [file 9638584]

Right common carotid artery

Right subclavian artery

Brachiocephalic trunk

Arch of Aorta

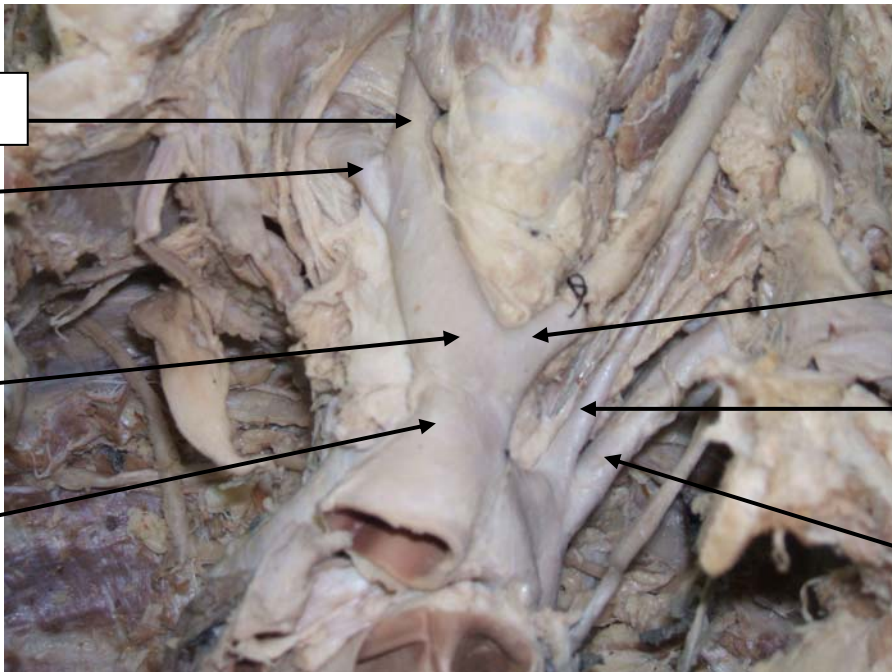

Left common carotid artery

Left vertebral artery

Left subclavian artery
